# Supplementary material for: Mycoviromic Analysis Unveils Complex Virus Composition in a Hypovirulent Strain of Sclerotinia sclerotiorum
Source: MDPI journal article supplement (doi:10.3390/jof8070649), 2022-06-21
Supplement: s1 [file s1]

## Supplementary Materials

**Table S1.** Primers for virus detection in this paper.

| Name       | Target    | Primer name | Primer sequence         | Amplicon size (bp) |
|------------|-----------|-------------|-------------------------|--------------------|
| SsMV1      | sequence1 | F           | CACCGAGCATTCCATACTGG    | 671                |
|            |           | R           | AGTCCAGAGATCTCAACGCC    |                    |
| SsNV4_RNA1 | sequence2 | F           | TTCCATCCAGTTGAGGCAGC    | 542                |
|            |           | R           | GATTCCAAGACGTCCCATGG    |                    |
| SsNV4_RNA2 | sequence3 | F           | TTCTTGTCCGAGATCGAACAGG  | 634                |
|            |           | R           | TCTTCTCTTTGGCTGGTCCAG   |                    |
| SsNSRV1    | sequence4 | F           | CGTTGGCGATGATGTATTACGC  | 610                |
|            |           | R           | GTTGCTGCAACATCGAAGGAC   |                    |
| SsOLV14    | sequence5 | F           | GAACAGACCTCATGGTGCCT    | 606                |
|            |           | R           | TGCTCGACTTCGAAACCGAC    |                    |
| SsOLV22    | sequence6 | F           | GATTTCTCAGGCTCAGCGC     | 1013               |
|            |           | R           | GTACTTTCCTTCTCCGGACGC   |                    |
| SsMV6      | -         | F           | GCTATTACAGATGCGGTAACGC  | 693                |
|            |           | R           | ACGTAACAGAGATGGA ACTCCG |                    |
| SsActin    | -         | F           | GCACCAGAGGAGCACCCAGTTTT | 415                |
|            |           | R           | TGGAAGATTGACTGGCGGTTTGA |                    |

SsMV6 refers to the primers for the detection of *Sclerotinia sclerotiorum* mitovirus 6; SsActin refers to the primers for the detection of the *actin* gene of *Sclerotinia sclerotiorum*.

**Table S2.** Primers for full-length genome confirmation of SsOLV22.

| Primer              | Sequence                                                 | Primers used for                   |
|---------------------|----------------------------------------------------------|------------------------------------|
| SsOLV22P1F          | AGCCTTCTTTTCTCCACTTGGAG                                  |                                    |
| SsOLV22P1R          | CTCTTCTCTCGTGCTTCTGCG                                    |                                    |
| SsOLV22-HC025-det1F | GATTTCTCAGGCTCAGCGC                                      |                                    |
| SsOLV22-HC025-det1R | GTACTTTCCTTCTCCGGACGC                                    |                                    |
| SsOLV22P2F          | CGGCTGCTTATGGCAGTATG                                     | determination of internal sequence |
| SsOLV22P2R          | AGGAAACACTCCGCTAGACG                                     |                                    |
| SsOLV22P3F          | TTGATCCGCCTCTTCCCAGAAG                                   |                                    |
| SsOLV22P3R          | ACTTGGACTTCCGTGCAGTG                                     |                                    |
| SsOLV22end3P1       | CTTGAGAGATCGCCCACTTGC                                    |                                    |
| SsOLV22end3P2       | CAATGCCGACTCTTTAGGCAG                                    |                                    |
| SsOLV22end5P1       | CTTACCGCACATGAAAACCTC                                    |                                    |
| SsOLV22end5P2       | TTTGGTAGAGAGTAGCCACA                                     |                                    |
| RACE-OLIGO          | GCATTGCATCATGATCGATCGAATTCT<br>TTAGTGAGGGTTAATTGCC-(NH2) | determination of terminal sequence |
| O5RACE-1            | GGCAATTAACCCTCACTAAAG                                    |                                    |
| O5RACE-2            | TCACTAAAGAATTCGATCGATC                                   |                                    |
| O5RACE-3            | CGATCGATCATGATGCAATGC                                    |                                    |

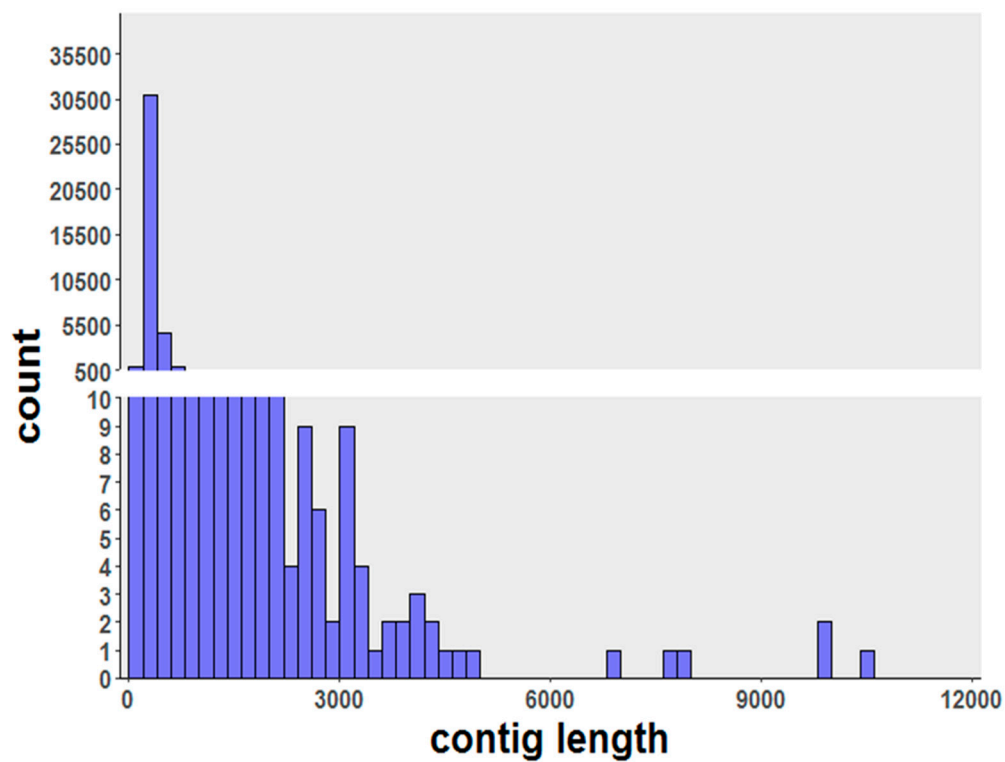

**Figure S1.** Contig length distribution histogram.

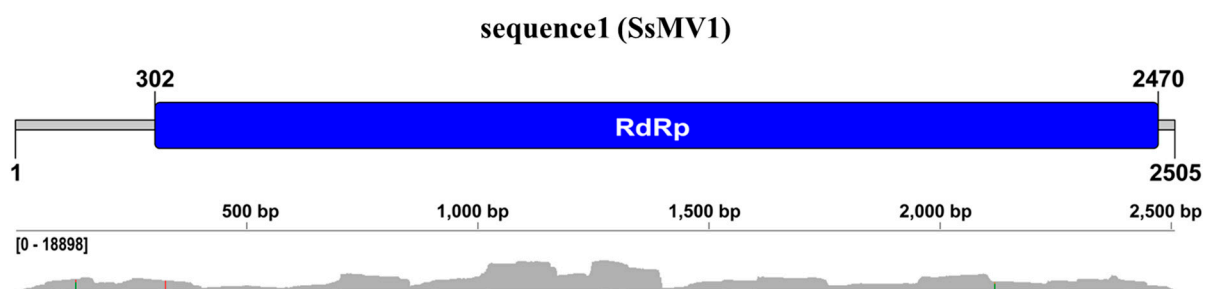

**Figure S2.** Genome analysis of SsMV1 in strain HC025. Schematic organization and annotation of the genome of SsMV1. The putative ORF was indicated as a (upper panel), and the reads distribution profile was demonstrated below. The number in the square bracket indicated the number range of reads mapped to each nucleotide acid site of the sequence.

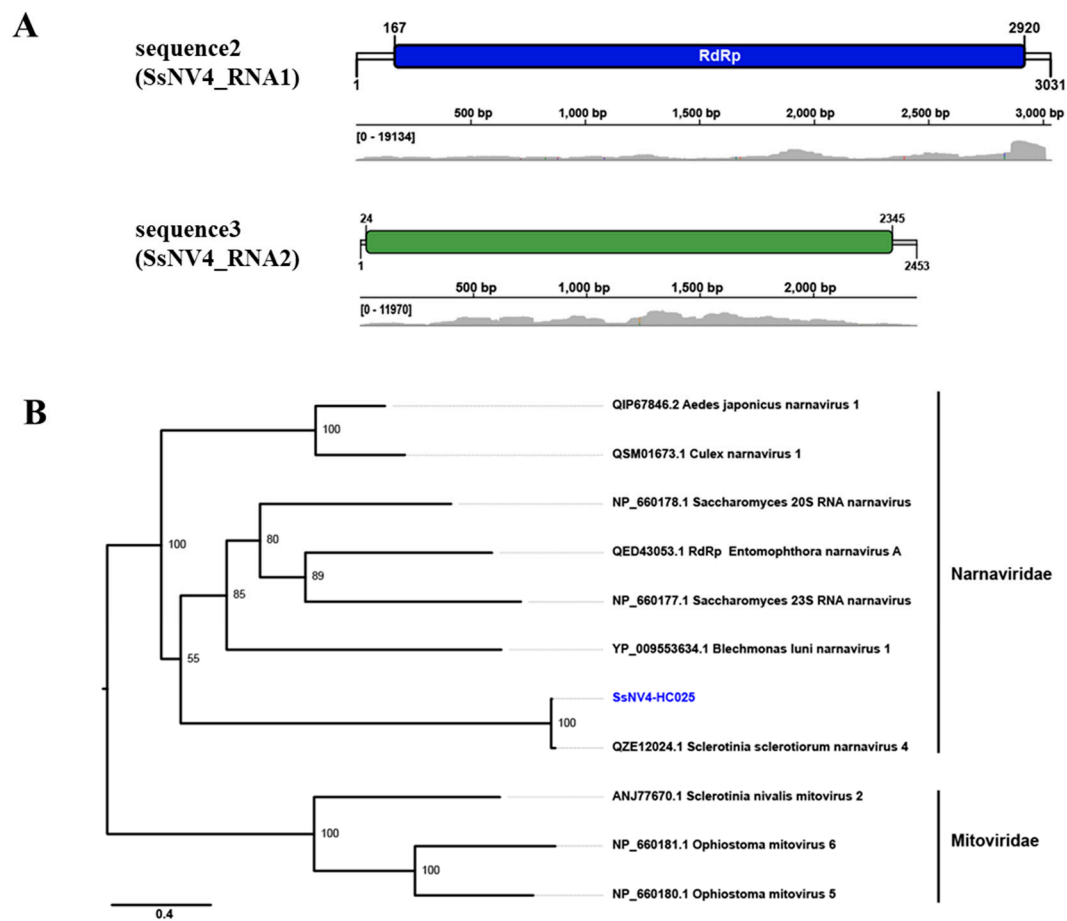

**Figure S3.** Genome and phylogenetic analysis of SsNV4 in strain HC025. (A) Schematic organization and annotations of the genome of SsNV4-HC025. The putative ORFs of each segment were indicated as boxes, while the reads distribution profile was demonstrated below. The number in the square bracket indicated the number range of reads mapped to each nucleotide acid site of the sequences. (B) The phylogenetic analysis of virus SsNV4-HC025. This maximum likelihood phylogenetic tree was constructed based on the amino acid sequences of viral RdRps. Virus SsNV4-HC025 was marked with blue colour.

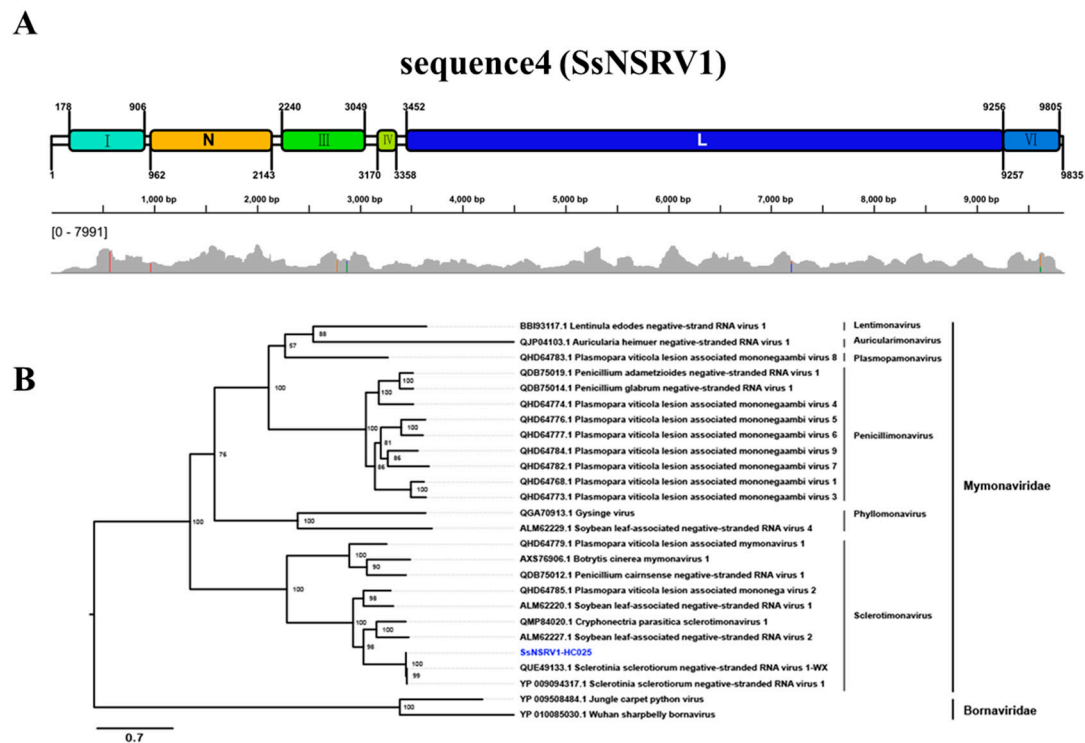

**Figure S4.** Genome and phylogenetic analysis of SsNSRV1 in strain HC025. **(A)** Schematic organization and annotation of the SsNSRV1-HC025 genome. The putative ORFs were indicated as boxes of various lengths (upper panel), and the reads distribution profile was demonstrated below. N refers to nucleoprotein and L refers to large polymerase. The number in the square bracket indicated the number range of reads mapped to each nucleotide acid site of the sequence. **(B)** The phylogenetic analysis of the virus SsNSRV1-HC025. This maximum likelihood phylogenetic tree was constructed based on the amino acid sequences of viral L protein. Virus SsNSRV1-HC025 was marked with blue colour.

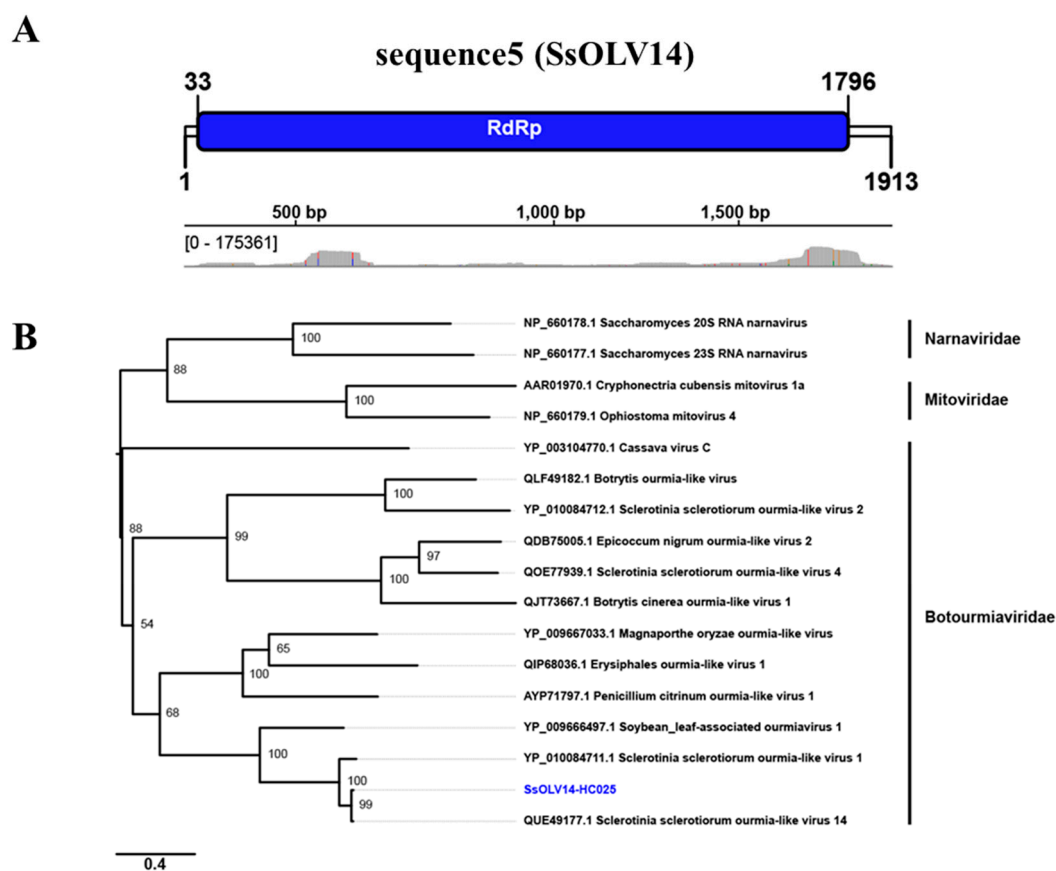

**Figure S5.** Genome and phylogenetic analysis of SsOLV14 in strain HC025. **(A)** Schematic organization and annotation of the SsOLV14-HC025 genome. The putative ORF was indicated as a box. The reads distribution profile of the sequence was demonstrated below. The number in the square bracket indicated the number range of reads mapped to each nucleotide acid site of the sequence. **(B)** the phylogenetic analysis of the virus SsOLV14-HC025. This maximum likelihood phylogenetic tree was constructed based on the amino acid sequences of viral RdRps. Virus SsOLV14-HC025 was marked with blue colour.
